# Supplementary material
Source: MDPI journal article supplement (https://www.mdpi.com/2073-4395/10/12/1979)
Supplement: s1 [file s1]

Supplementary Materials:

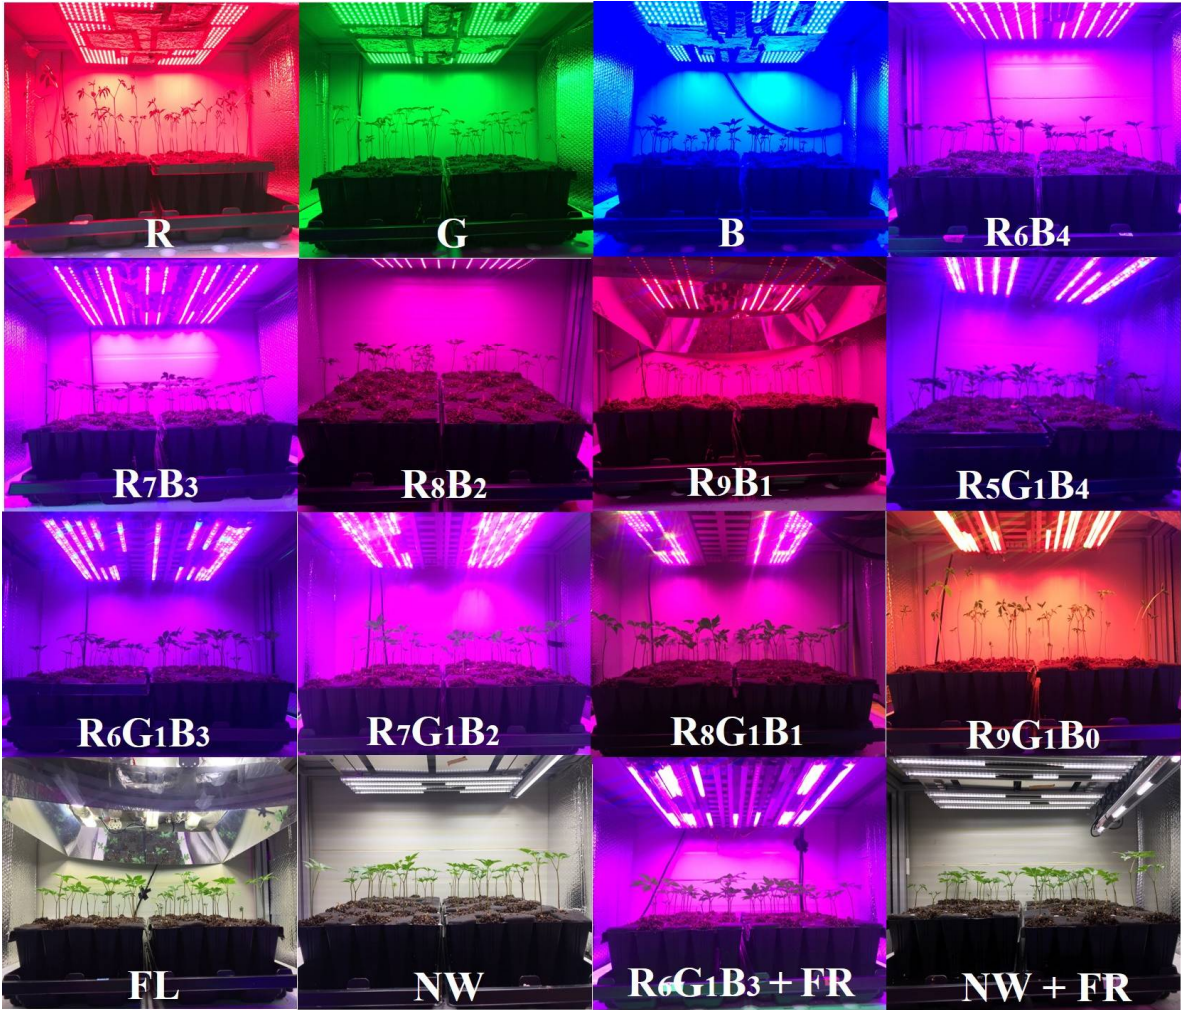

Figure S1. Ginseng seedlings were cultivated under various light treatments for 5 weeks.
